# Supplementary material
Source: MDPI journal article supplement (https://www.mdpi.com/2674-0389/2/1/8)
Supplement: s1 [file s1]

# Morphology Controlled WO<sub>3</sub> for the Photocatalytic Oxidation of Methane to Methanol in Mild Conditions

Dumindu Premachandra<sup>1,2</sup>, and Michael D. Heagy<sup>2\*</sup>

<sup>1</sup>Department of Chemistry, New Mexico Institute of Mining and Technology  
801, Leroy Pl, Socorro, NM, 87801 USA

<sup>2</sup>School of Chemistry and Materials Science, Rochester Institute of Technology  
One Lomb Memorial Drive, Rochester, NY 14623 USA

\*Corresponding author: mdhsch@rit.edu

## Supplementary information

### Table of Contents

1. Figure S1. PXRD spectra of WO<sub>3</sub> morphologies..... S3
2. Figure S2. WO<sub>3</sub> Flowers with different electron scavengers..... S3
3. Figure S3. The yield of methanol in the photocatalytic partial oxidation of methane for WO<sub>3</sub> flowers/2 mM H<sub>2</sub>O<sub>2</sub>. .... S4
4. Figure S4. FESEM image of WO<sub>3</sub> nanowires with high agglomeration ..... S4

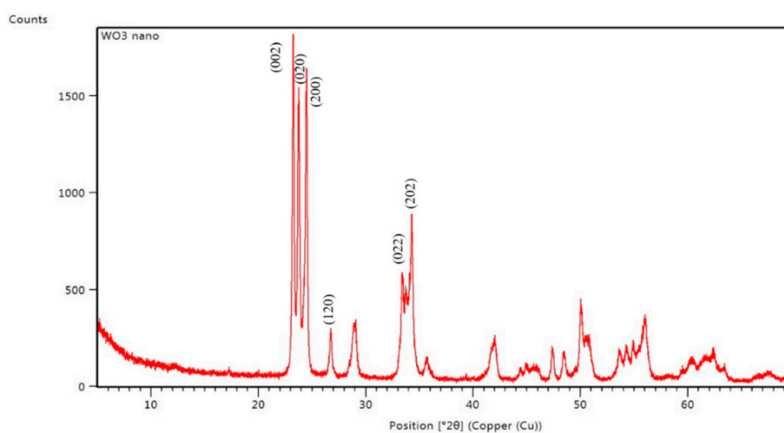

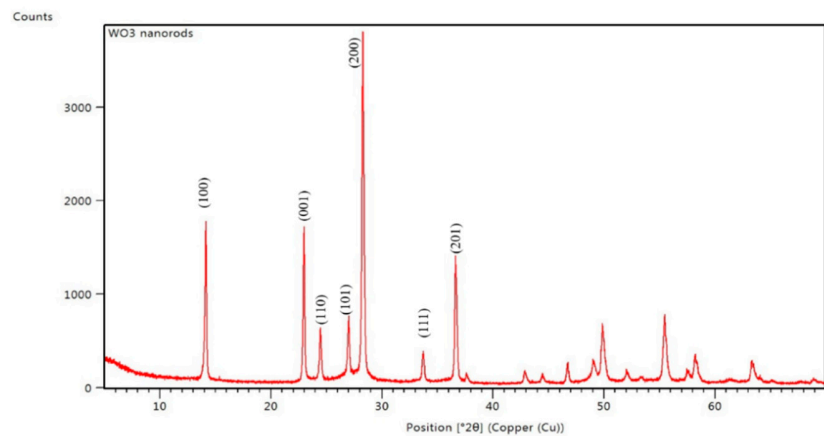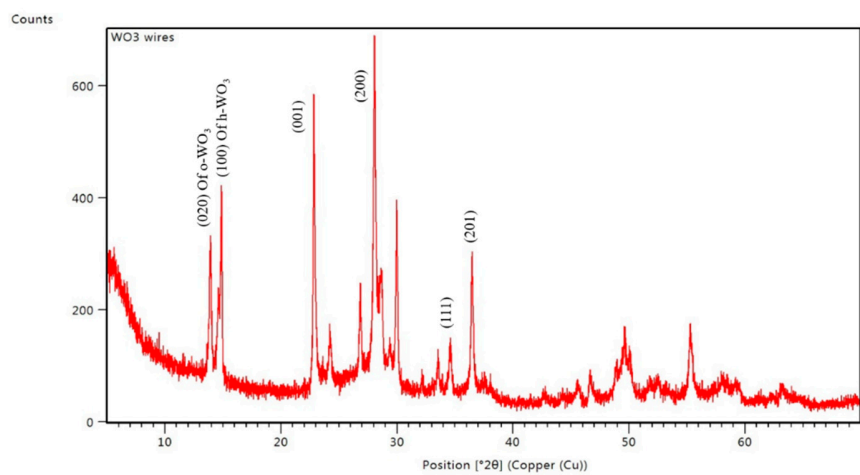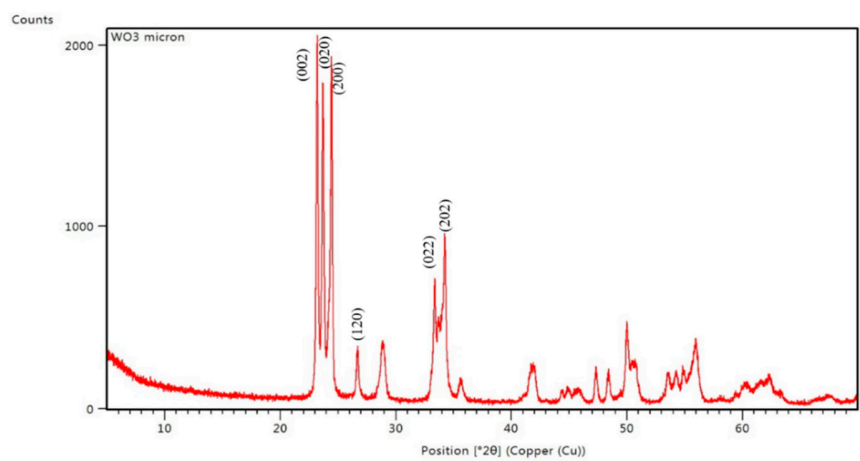

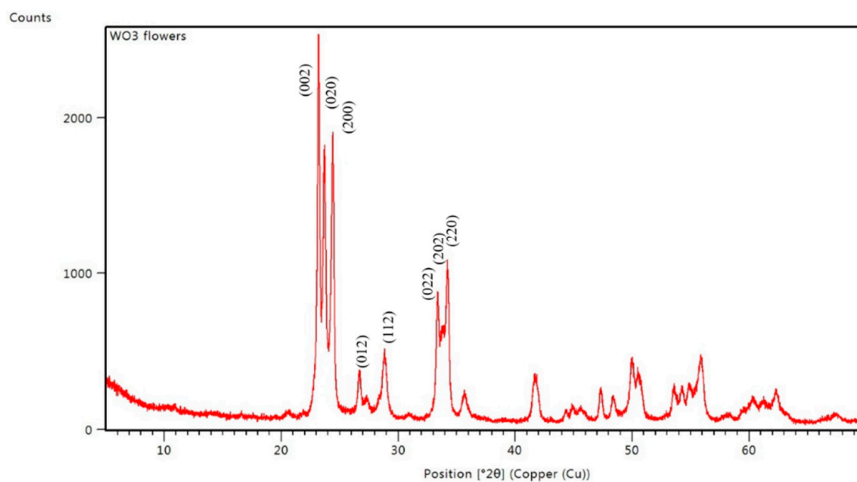

Figure S1. PXRD spectra of WO<sub>3</sub> morphologies.

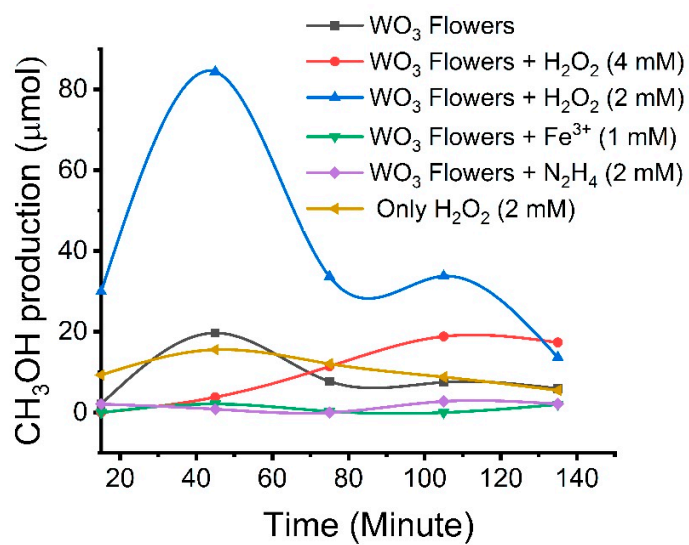

Figure S2. WO<sub>3</sub> Flowers with different electron scavengers (Reaction conditions; temperature = 50 °C, pH ≈ 7, UV light irradiation, CH<sub>4</sub>/N<sub>2</sub> bubbling with 100 mL/min).

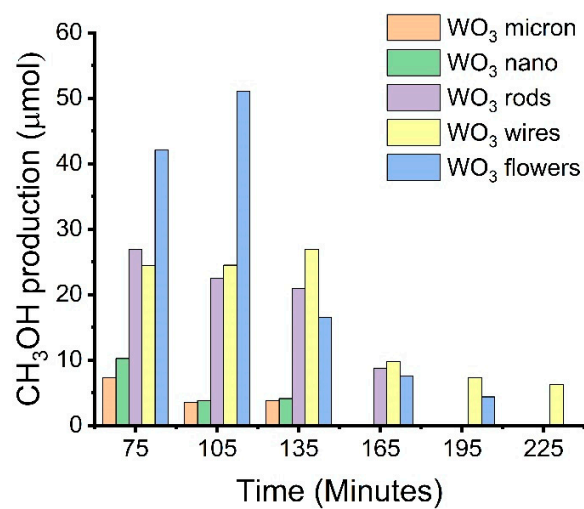

Figure S3. The yield of methanol in the photocatalytic partial oxidation of methane for WO<sub>3</sub> flowers/2 mM H<sub>2</sub>O<sub>2</sub> (Reaction conditions; temperature = 50 °C, pH ≈ 7, UV light irradiation, CH<sub>4</sub>/N<sub>2</sub> bubbling with 100 mL/min).

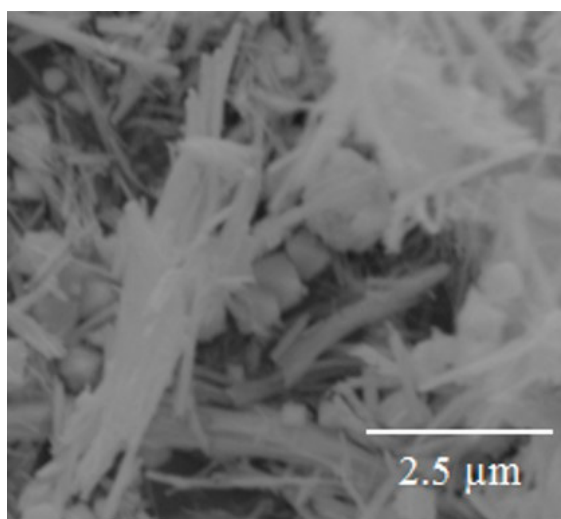

Figure S4. FESEM image of WO<sub>3</sub> nanowires with high agglomeration
